# Supplementary figures and images for: The complete mitochondrial genome of the oriental fruit moth Grapholita molesta (Busck) (Lepidoptera: Tortricidae)
Source: PubMed Central journal article supplement — Mol Biol Rep. 2011 Jun 14;39(3):2893–900. doi: 10.1007/s11033-011-1049-y (PMC3271229; doi:10.1007/s11033-011-1049-y), 2011-06-14

**A**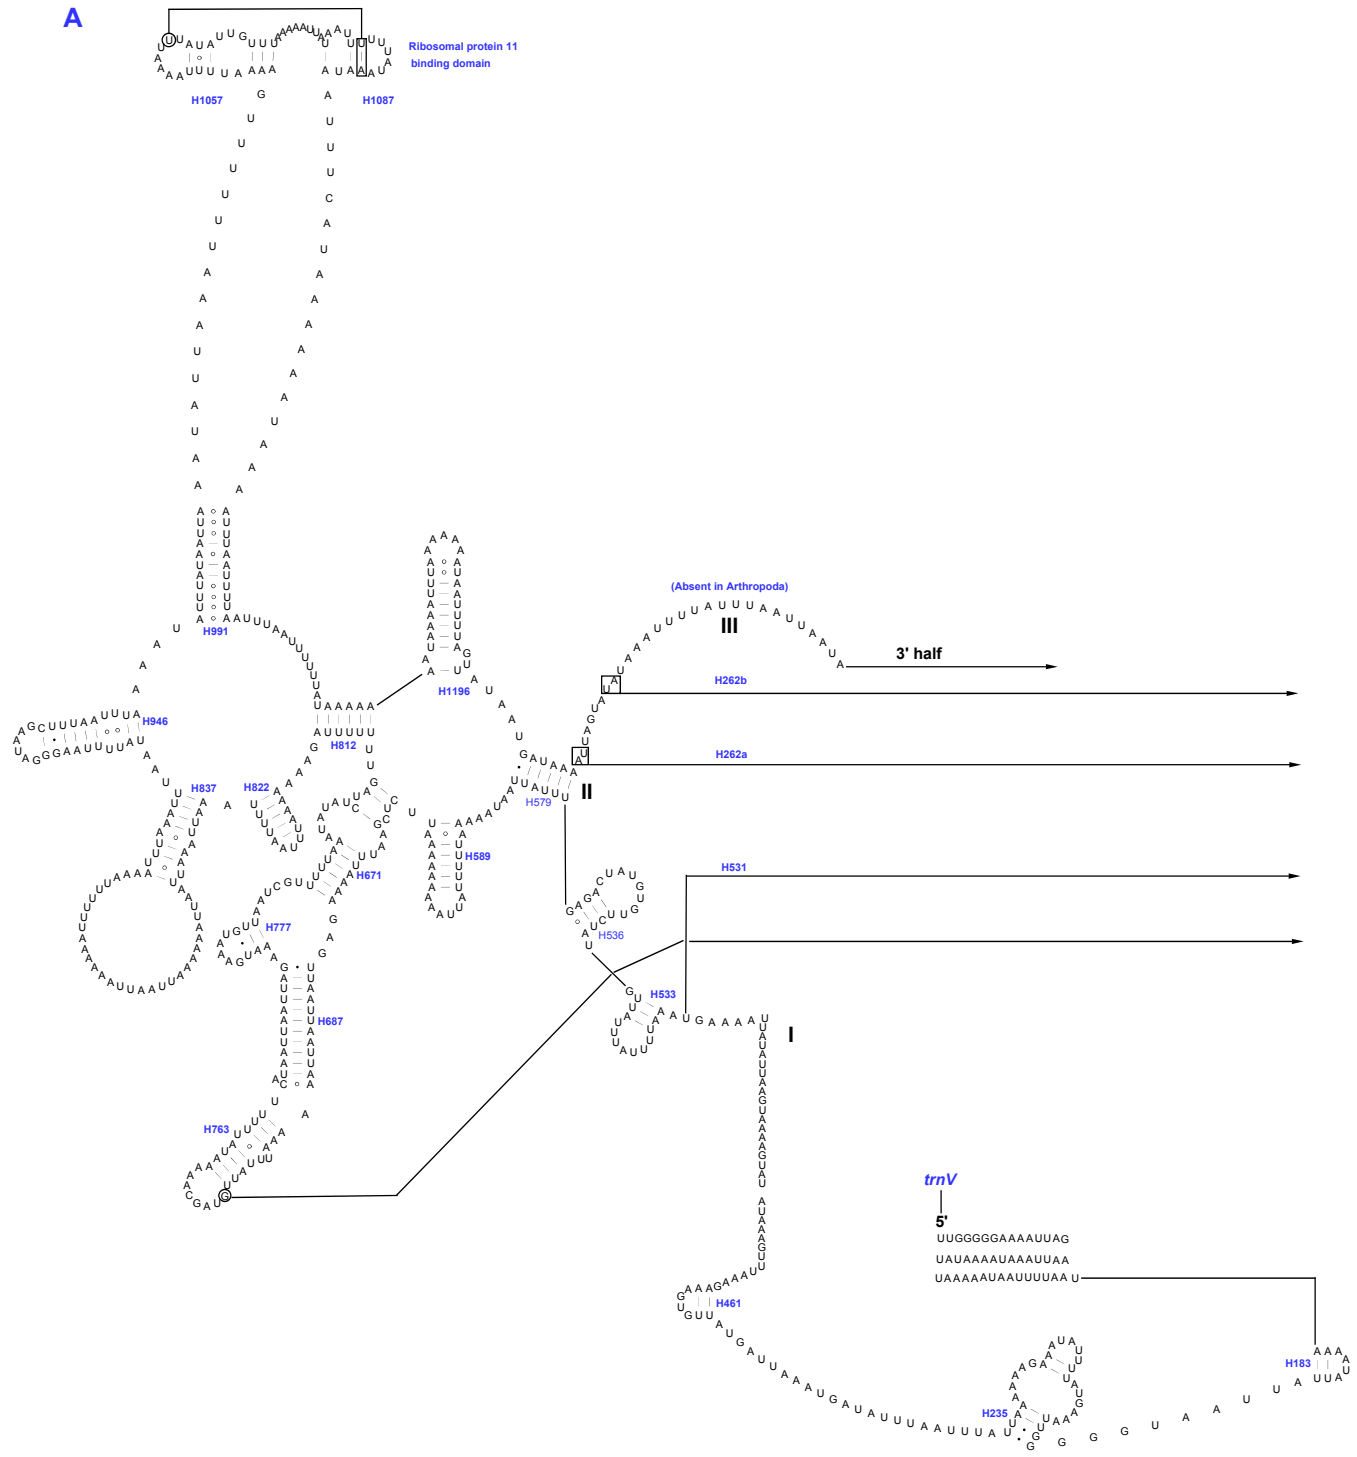

Supplement: 11033_2011_1049_MOESM1_ESM.pdf [file 11033_2011_1049_MOESM1_ESM.pdf]

**B**

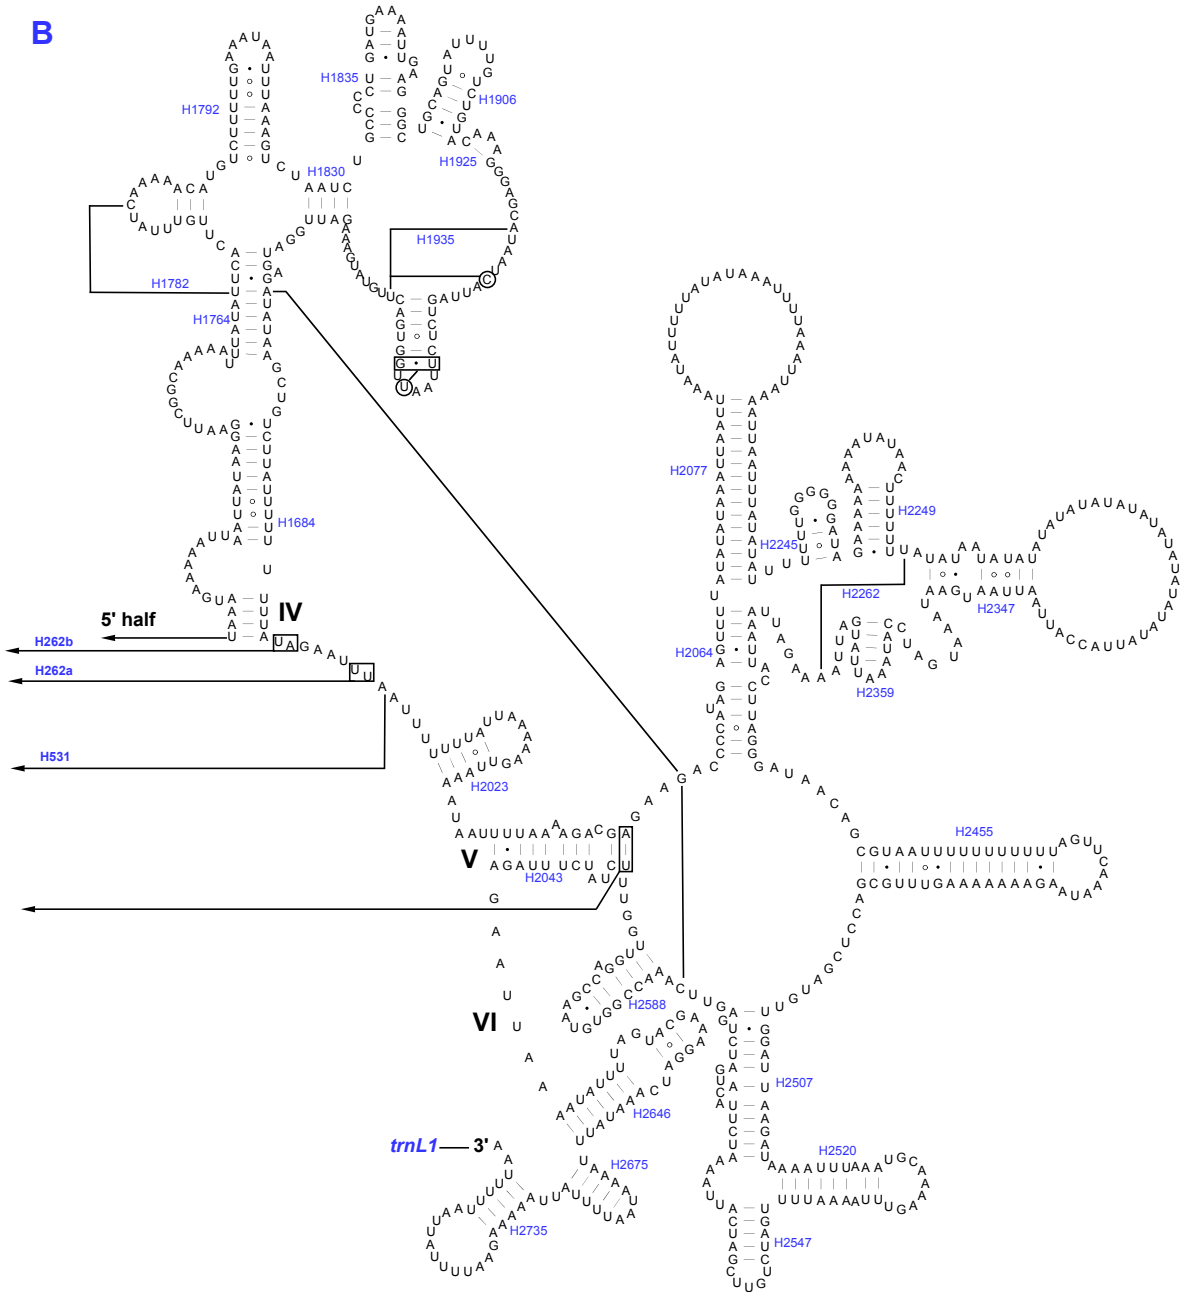

Supplement: 11033_2011_1049_MOESM2_ESM.pdf [file 11033_2011_1049_MOESM2_ESM.pdf]
